# Supplementary material for: Capture‐C reveals preformed chromatin interactions between HIF‐binding sites and distant promoters
Source: PubMed Central journal article supplement (PMC5048371; doi:10.15252/embr.201642198), 2016-08-09
Supplement: EMBR-17-1410-s001.pdf [file EMBR-17-1410-s001.pdf]

**Capture-C reveals preformed chromatin interactions between  
HIF-binding sites and distant promoters**

Platt JL<sup>1</sup>, Salama R<sup>1</sup>, Smythies J<sup>1</sup>, Choudhry H<sup>2</sup>, Davies JOJ<sup>3</sup>, Hughes JR<sup>3</sup>, Ratcliffe

PJ<sup>4\*</sup>, Mole DR<sup>1\*</sup>

**Figure S1**

**A**

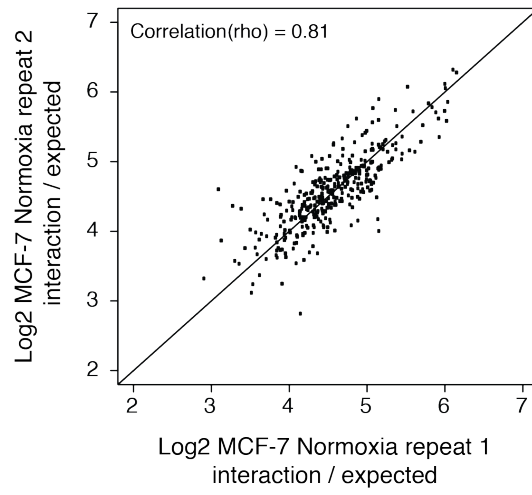

**B**

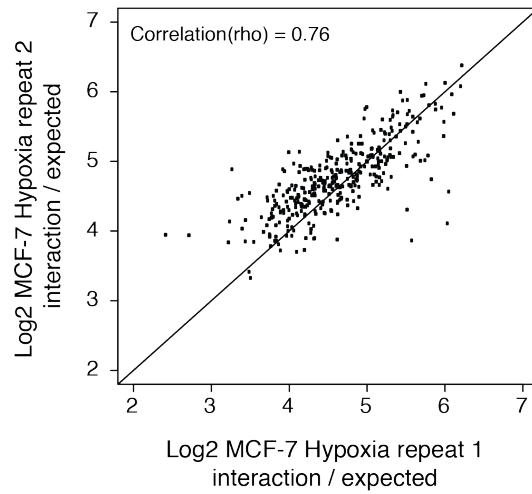

**C**

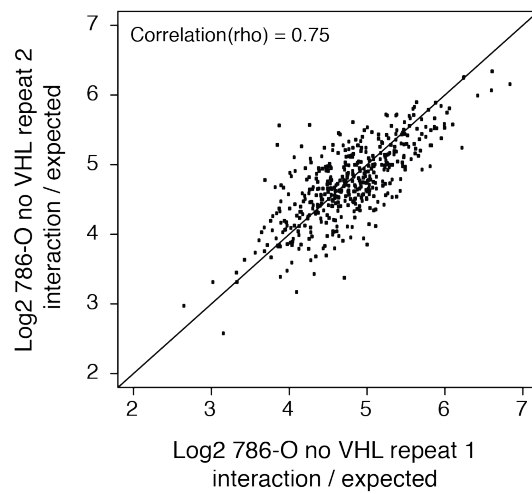

### **Figure S1: Reproducibility of Capture-C.**

Capture-C experiments were performed in duplicate. For each site that looped to a HIF-binding site, the interaction frequencies (normalized to the number of informative reads in each dataset and to the expected distribution of counts at a given distance from the capture site) for the two replicates were plotted against each other for:

- A) MCF-7 cells in normoxia
- B) MCF-7 cells in hypoxia
- C) 786-O cells.

Figure S2

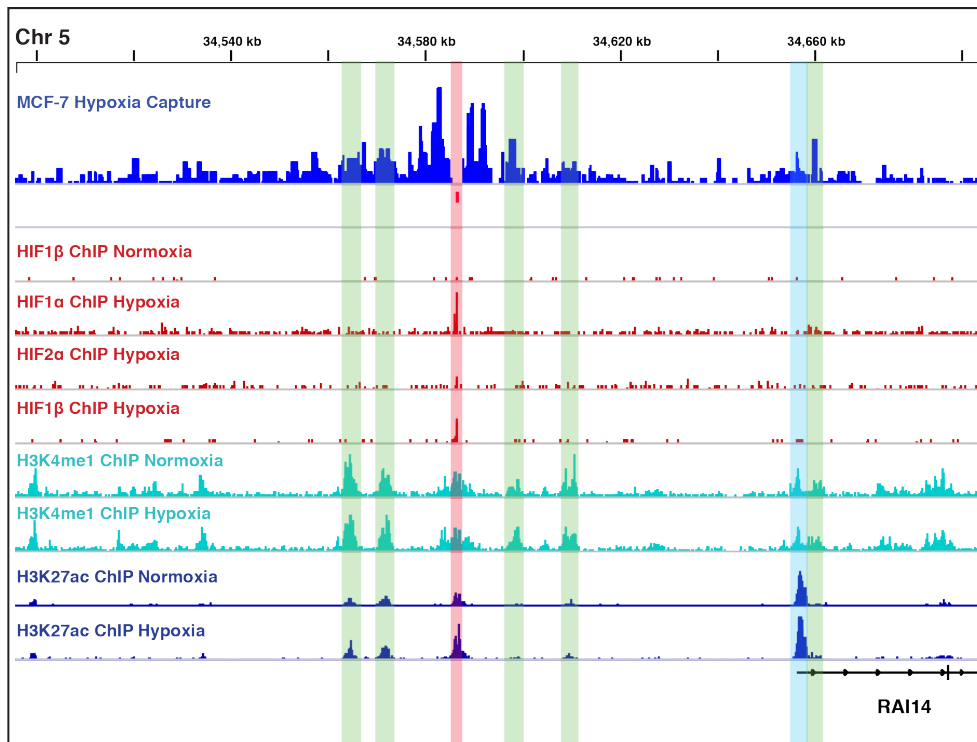

**Figure S2: Looping of HIF-binding site to promoters and enhancers.**

Capture-C (top) and ChIP-seq tracks for subunits of HIF, H3K4me1, H3K27ac, and RNAPol2 at the RAI14 gene locus, in MCF-7 cells. Capture-C was performed using oligonucleotides towards the 'viewpoint' region at the HIF binding site (highlighted in red). Looping to the transcriptional start site of the RAI14 gene is highlighted in blue, looping to other enhancers is highlighted in green.

**Figure S3**

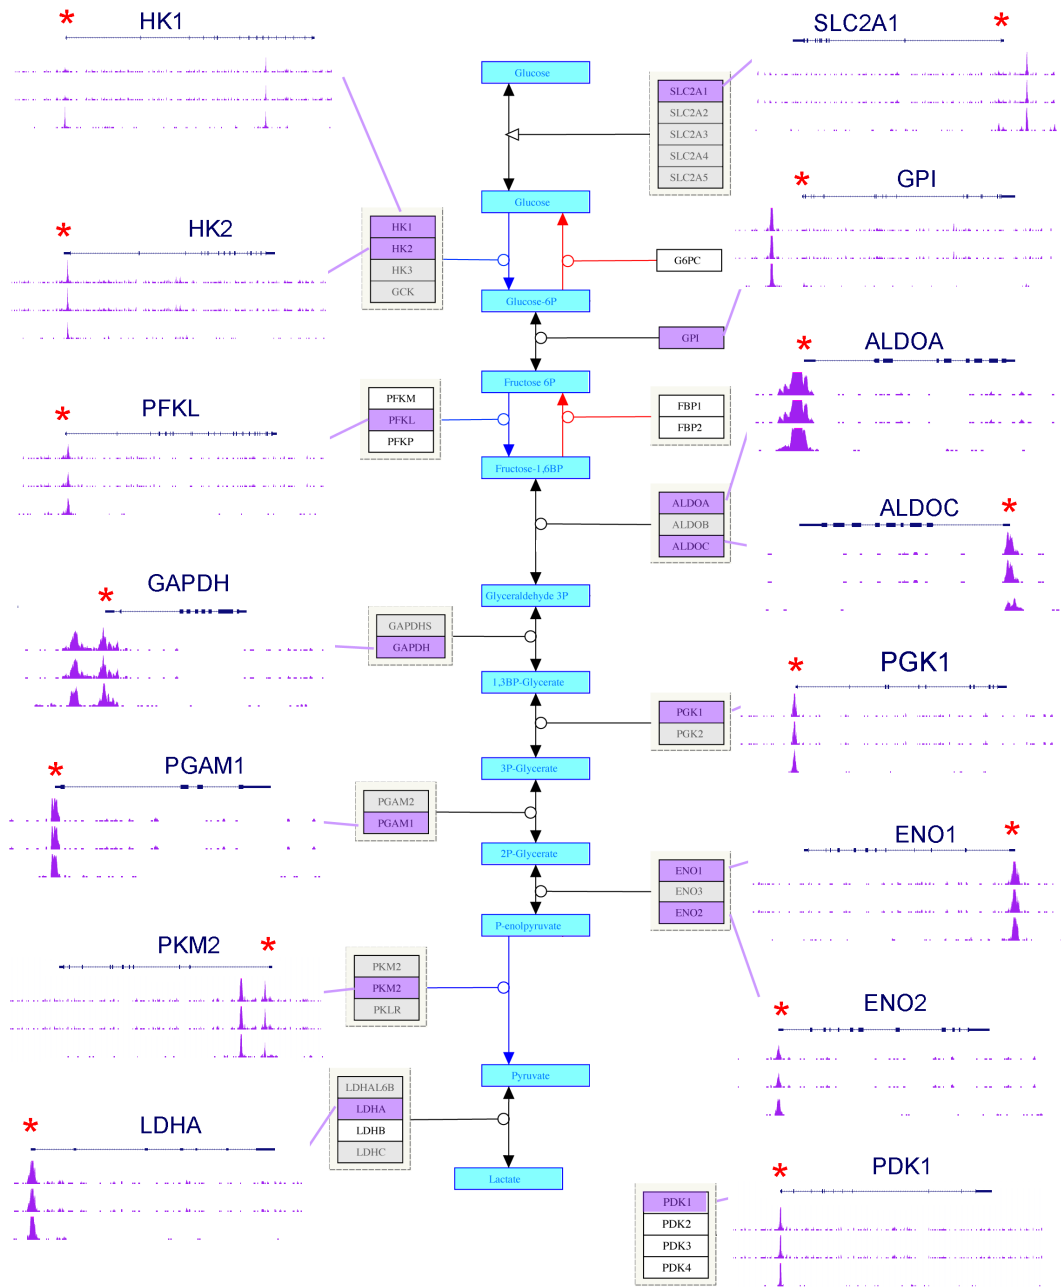

**Figure S3: HIF binding at glycolysis pathway and related genes.**

The glycolysis pathway shown with metabolic substrates highlighted in blue together with the enzymes that catalyze each step. Those enzymes highlighted in grey are not expressed in MCF-7 cells (as judged by lack of signal in RNA-seq analysis). Those highlighted in purple are hypoxia-regulated (in the same RNA-seq analysis). Tracks (in order) for HIF1 $\alpha$ , HIF2 $\alpha$  and HIF1 $\beta$  ChIP-seq signals are shown in purple for each regulated gene in purple together with the positions of the MCF-7 transcript in blue and the transcriptional start site (red asterix).

Figure S4

A

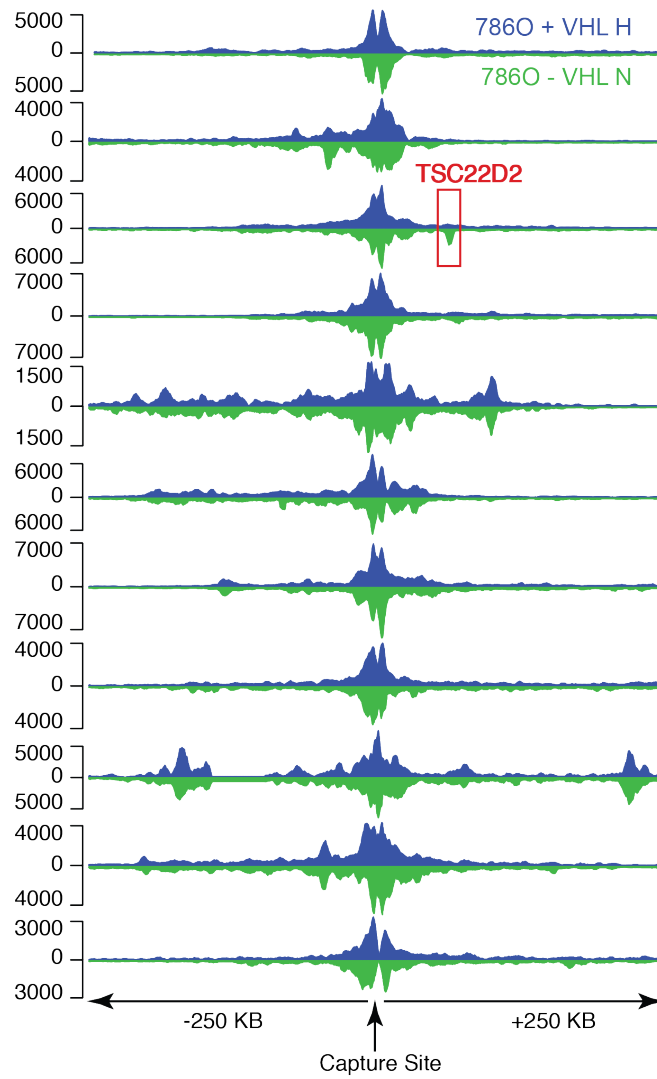

B

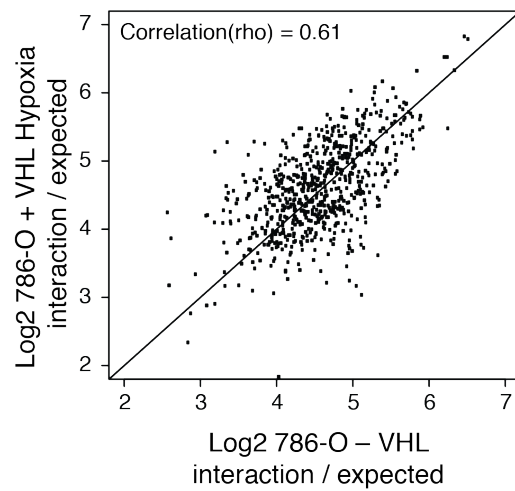



#### **Figure S4: Chromatin looping is stable after long term HIF stabilisation**

- A) Capture-C tracks from hypoxic 786-O cells reconstituted with wtVHL (blue) and 786-O cells with defective VHL (inverted in green) are shown for each HIF-binding site captured. A single promoter site that differentially captured (TSC2202) is highlighted in red.
- B) For each site that looped to a HIF-binding site, the normalized interaction frequency in hypoxic 786-O cells reconstituted with wtVHL (vertical axis) was plotted against that in 786-O cells (horizontal axis).

**Figure S5**

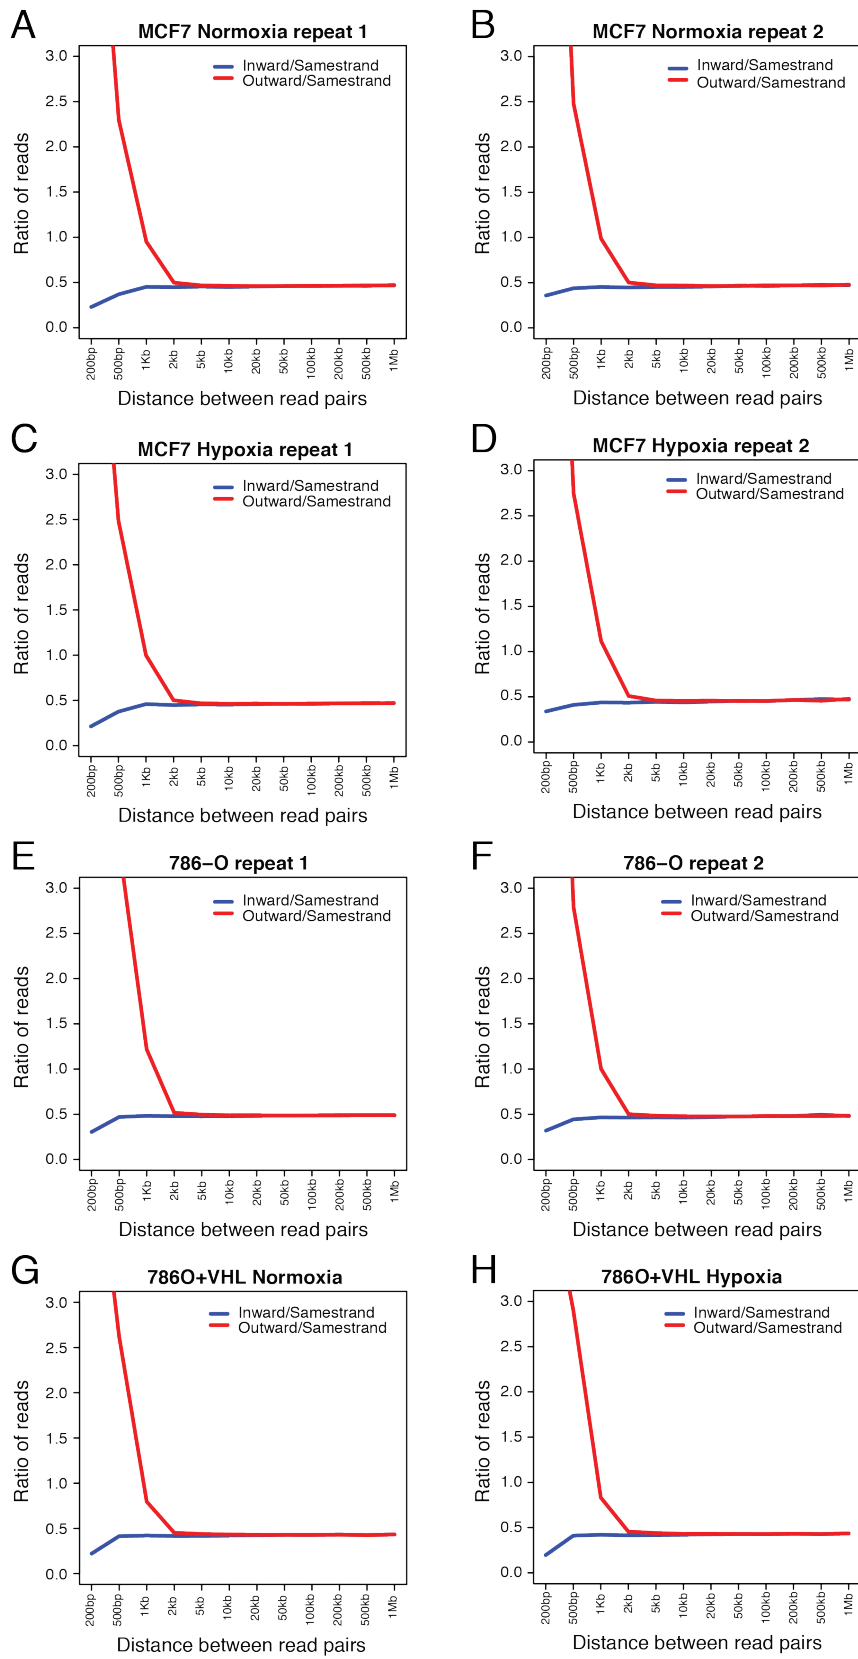

**Figure S5: Composition of paired-end Capture-C reads in different experiments as a function of the genomic distance between a pair of reads.**

All aligned Dpn2 fragment pairs were identified and the genomic distance between them were calculated as the gap size between the two fragments. For each fragment pairs we identified their relative orientation as being inward, outward or same-strand as previously described[1], and then computed the ratios between the classes of read pairs as indicated relative to genomic distance. Blue line = inward/samestrand; red line = outward/samestrand, plotted against genomic distance between read pairs. The expected ratios are 0.5 if two fragments are truly cut and ligated.

Figure S6

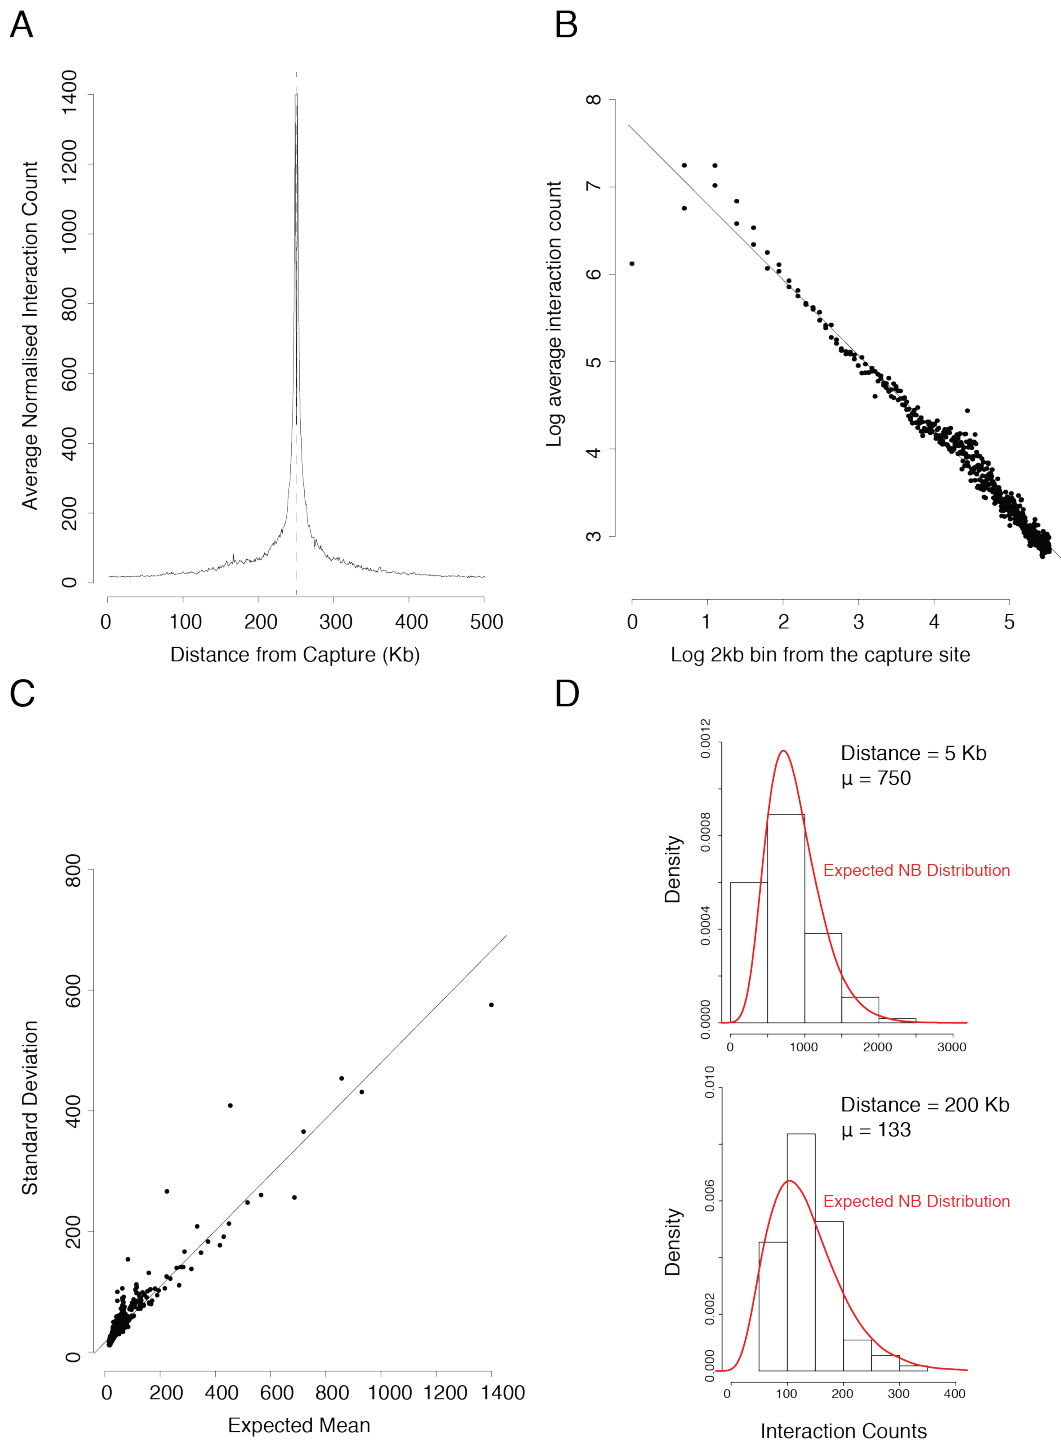

**Figure S6:**

- A) Normalized average capture signal (RPKM) across all capture probes  $\pm 250$  kb. This shows the random expected signal at a specified distance.
- B) Data is aggregated in bins as explained in the methods. The log of the signal in every bin is plotted against the log of the bin's distance to the capture probe.
- C) For every bin, the mean and variance is calculated across all the probes. The index of dispersion (variance/mean) for all the bins is plotted against its mean. This shows a linear relationship, which allowed us to estimate the dispersion parameter of a negative binomial distribution.
- D) The distribution predicted by the model represented in red lines, is overlaid on top of the histogram showing the actual signal at a distance of 5 kb and at a distance of 200 kb. This red line shows a good fit to the actual data.

**Figure S7**

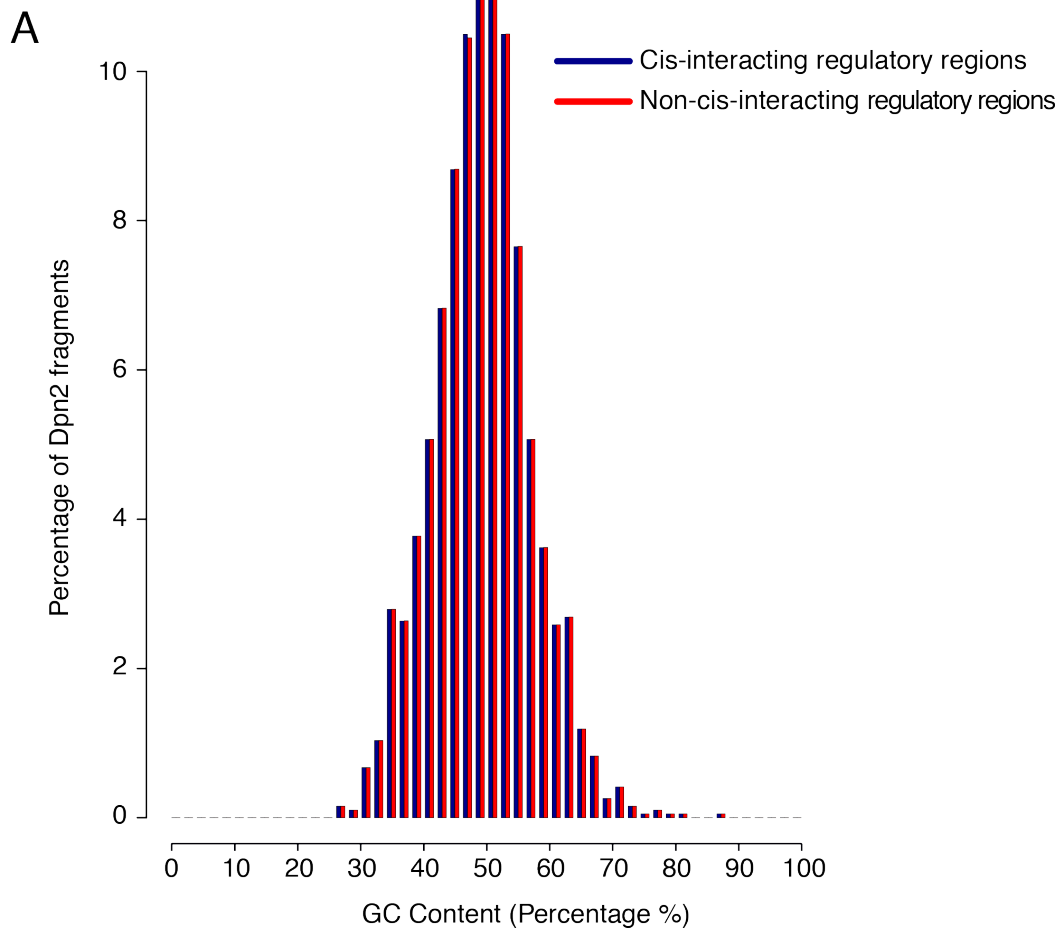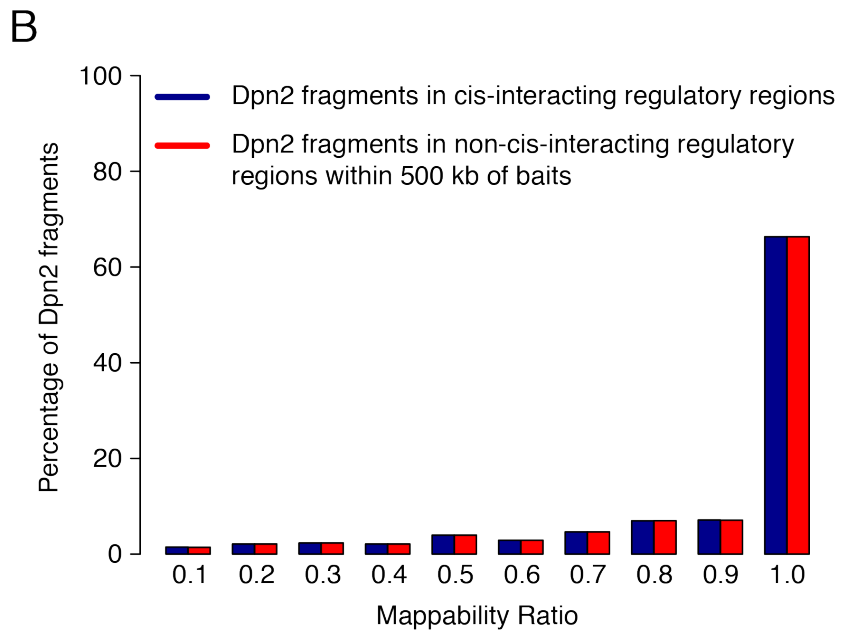

### **Figure S7: Effects of GC-content and mappability on the contact frequency**

- A) The GC-content of the 200 bases at each end of each Dpn2 fragment was calculated. Frequency distributions were plotted showing the percentage of Dpn2 fragment ends with varying GC-content. In blue are data for statistically-significant cis-interacting regulatory regions. For comparison in red are data for similarly defined regulatory elements within 500 kb of each bait site that did not interact. Cis-interacting and control, non-cis-interacting, regulatory regions had comparable levels of GC-content.
- B) 50-base pseudo-reads were generated every 9 bases within regions up to 200 bases from the end of each Dpn2 fragment similar to previously described[1]. Bowtie was then used to determine the fraction of uniquely mapped pseudo-reads (mappability) expressed on a scale of 0 (no pseudo-reads mapped uniquely) to 1 (all pseudo-reads mapped uniquely). The proportion of Dpn2 fragments with varying degrees of mappability was then plotted as a frequency histogram for Dpn2 fragments within statistically significant cis-interacting regulatory regions (blue bars) and non-cis-interacting regulatory regions within 500 kb of bait sites (red bars). The majority of Dpn2 fragments revealed a high degree of mappability indicating good coverage. Furthermore, comparable levels of mappability were observed between statistically significant cis-interacting regulatory regions and for non-interacting regulatory regions.

**Table S1: Bait sites and capture probes**

| Bait Dpn2 fragment       | capture type | Cell type | probe 1 sequence                                                                                                                                                                     | probe 2 sequence                                                                                                                                                                     |
|--------------------------|--------------|-----------|--------------------------------------------------------------------------------------------------------------------------------------------------------------------------------------|--------------------------------------------------------------------------------------------------------------------------------------------------------------------------------------|
| chr1:115666026-115667357 | enhancer     | 7860      | GAT CTA GGA CAT GAG<br>CAT ATA TAA GGC GAT<br>ATG CAT ATG CCC AGG<br>AAA GAC GTG AGA AAG<br>TCC ACA TCT CTC ATC<br>TCT GGC TGA CAT TGA<br>GGC TCT GCA CAG CAA<br>GAA GTG AAG GGT TAG | GAG GCT GTC AAT CAT<br>GAA TTT TAT ATT AAG<br>CAA AAC TAT CCT TCA<br>AAA ATG AAG GAG AGG<br>TTG GGC ACA GTG GCT<br>CAC GCC TGT AAT CCC<br>AGC ACT TTG GGA GGC<br>AGA GGT GGG TGG ATC |
| chr1:43424102-43424740   | promoter     | N/A       | GAT CCG AAG CCC ATC<br>CCC ACT GCG GCC AGC<br>GGC CCG GCG GGG CGC<br>TGC GCT CGG GAC CCG<br>CAC CGA GCC AGG CTC<br>GGA GAG GCG CGC GGC<br>CCG CCC CGG GCG CAC<br>AGC GCA GCG GGG CGG | GGA CCT CGG GGC GGG<br>GCC TGG GGC CCA GCC<br>TGT CCT GGG CGG CGC<br>TCT GCG GGG AGG GGG<br>TGA GGG GAG TGG CCG<br>GGG CCG GGG CCC CCC<br>CTA ACC ACT GCC TCG<br>CTC AGG CTG CCG ATC |
| chr1:8086133-8087834     | promoter     | N/A       | GAT CCC GGC GCC CGG<br>CGC GGG GCC CCC TGA<br>GGG AAC GGA GCG CTG<br>CGT GGC CCT CCC CAC<br>CCC CTC AGC GCG CCA<br>GGC CCC TTA CCC CGG<br>AGG AGC GGC GGC TGC<br>CCC GCG GCG CCC TCC | TAG AAC AAA TTC CCT<br>GGC TGG TCC TCT GTT<br>GGG AGA GCC CAG AGA<br>CCT GTC GCT GAC CTC<br>TAG CCT CCT GGA GCC<br>CCT GCT TGC ACT TCA<br>GCA ATA ATG CCT GAT<br>AGT TAG ACA CTG ATC |
| chr1:8938715-8938952     | promoter     | N/A       | GAT CTC CGT GCT CCG<br>GGT ACC CAC AGA TAC<br>TGT CCG CGC CGC CCG<br>CGC CGA CTT CCT GCC<br>TAG CTA AGG CGA GCC<br>CCA CCC ACT TCC CGC<br>CTC CGG GGC ACG CCC<br>CCT CAG CTC CGC CTC | TCG CCA TTC GTC GGG<br>AGA GCC GTC ACT CAT<br>TCC CTC ACC TCC CGG<br>AAA GGG GTG GGA CTG<br>CGA CGG CTG CAG TAG<br>CGT GGA AAG GGG GGT<br>GAC GTC CCG CGG ACT<br>TGA GGC GGG CAG ATC |
| chr2:173420581-173420782 | promoter     | N/A       | GAT CTG GGC GGC GGC<br>TGC GGC CTG GCG CGC<br>GCT CCG CAT CTC CTT<br>CCT CGG GAG GCT GGG<br>CGG GAC TCC GGC GAG<br>GGG GCG GGC CCC GCA<br>AGC GCC CGC CCC TTT<br>TCT CTC CCC GCC TCC | GCC CCG CAA GCG CCC<br>GCC CCT TTT CTC TCC<br>CCG CCT CCT TCC CGC<br>TCC GCG TCC CGC CCA<br>GCG GCG CAG GGG GCC<br>GGG CTC CGG CTA GGA<br>GGG TGG GGG CCG CGC<br>CGG TGA CAG CCG ATC |
| chr2:70823890-70824097   | enhancer     | 7860      | GAT CAC ACA TGC TGT<br>TCC CAA CTT CCC TTC<br>CCC TTG ACA CGC TGT<br>GGT GAA CTC TGA ATT<br>CCA GCA CGT CTC CAC<br>TCT GCT GTA GAG CCT<br>TTC TAG GGC TGG CAA<br>GCA TTC TGC CAC AGA | CTT TCT AGG GCT GGC<br>AAG CAT TCT GCC ACA<br>GAG CTG GTC TTT GTG<br>GCT TTA TGC CCA CAG<br>TAA TTA CTA GGG CTG<br>GGC CAT GCA ACC GTC<br>TAA CCT CTT CAA TTT<br>ACA GCC TCC AGG ATC |
| chr2:75060942-75061218   | promoter     | N/A       | GAT CAC GCT CCC CCC<br>ACC CAT AGC CGA GCC<br>TGA CGC GGC GGT GGC<br>TCA TGC GCC TTT CCG<br>TCC CAG CCT TTA GCC                                                                      | GTG TCT GAG CGG CCG<br>CGC CCG CGA GCC GTG<br>AGC GAT GAT TGG CTG<br>CGC CAC GGC GGC GGG<br>CGG TCC GTG GGC GCA                                                                      |



|                              |          |                   |                                                                                                                                                                                      |                                                                                                                                                                                      |
|------------------------------|----------|-------------------|--------------------------------------------------------------------------------------------------------------------------------------------------------------------------------------|--------------------------------------------------------------------------------------------------------------------------------------------------------------------------------------|
|                              |          |                   | ACG GAC CAC ACG TCC<br>CAT CTC AGG CGC CCC<br>GCC CCT CCC CCG CCC                                                                                                                    | CAC ACC CTC CCC GCG<br>CAG CCA ATG GGC GTG<br>CGC ACG TCA CTG ATC                                                                                                                    |
| chr3:150063120-<br>150063407 | enhancer | MCF7<br>&<br>7860 | GAT CCA GGA TTT CAC<br>CAT ATG CTA TTG GGT<br>CAT ATG TCT CAA AAC<br>TCA GGT GTG CTC ATC<br>GTT GAA CTA ATA ACC<br>TCA GTT ATT CAT TTG<br>GTT TCA AAA TGC TTA<br>TCC TGG CAC GTA CAG | CTG ATA AGC TAT TCT<br>GTG TTT AAA GCA CAT<br>ATT TTT AAA AAA TCA<br>GAG GTC TGC ATC TCC<br>AAG CAC AGG GCA GTC<br>CAG GAT AAA TCA GAC<br>CCA CTA AAA ATA TAA<br>GGA CTA TAG CTG ATC |
| chr5:14570251-<br>14570887   | enhancer | MCF7              | GAT CTT GTC ATT GAC<br>TCA CTC ATT CAT TCA<br>ATC AGC AAA TAT TTA<br>TTG AGT GAC TGC AAC<br>GTG CCA GGA GCT GGA<br>CAG TCA GCA AGA CAG<br>ATG AAG TCT GTG CAT<br>TCC ATG GTA TAG GGT | AAC CCA TAT TTG TTT<br>ATC CAC CTT AAT TTA<br>AGT TTG TTG TTA GTC<br>ATA GCT GAA AAT GGG<br>CTG GGT GTG GTG GCT<br>CAC ACC TGT AAT TCC<br>GGC ATT TTG GGA GGC<br>CCA GGC AAG TGG ATC |
| chr5:34586108-<br>34586774   | enhancer | MCF7<br>&<br>7860 | GAT CCA GGT GGC TTT<br>CAA AAA TCT TAG TAC<br>ATG AGA AAT ACC CCA<br>TGG CCC ACT CTC TTA<br>TTT CCC CTT TCA CCA<br>TGG AAA CTC GCC AAG<br>CTG AGT TTC TTG ACT<br>GGG CTA CCT GCA CGA | CCA ACA CAC ACA CCT<br>GCA TAC ACA TGC ACA<br>TGC AAA TTG TTT GAA<br>AGA AAC ATC ATA TGG<br>CCA GGT ACG GCG GCT<br>CAC GCC TGC AAT CTC<br>AGG ACT TTG GAT GGC<br>TGA GGC GGA AGG ATC |
| chr5:3926200-<br>3927567     | enhancer | MCF7              | GAT CTG GGC TGG TCT<br>CAG GTC GCA TTT CTT<br>GGA TTT CCC CTC CAG<br>GCG CTC AGC CCT TTT<br>CTG CGC TAC GTG CCC<br>TCC TGA TGC ATC CCT<br>TCT CCC ATT CCA TCA<br>GTG ACA CCC TTT CAC | TCC CAC CCG TCA ATA<br>CAC ATT TGT TTC CCT<br>CCC TGT CTC TGA GCT<br>GCC CTC TTG ACT CTG<br>GCC TAG CTT CTC CAA<br>CTC TAA CCA CTT TTG<br>TGT CTT TAT ACA ACA<br>TGG CCT CCT CTG ATC |
| chr5:90575785-<br>90576518   | enhancer | MCF7<br>&<br>7860 | GAT CCG CCC GCC TCG<br>GCC TCC CAG AGT GAT<br>GGG ATT ACA GGC GTG<br>AGC CAC CGC GCC CGG<br>CCT GTC TCA GGA ACT<br>TTC AAA GGG GAG TGG<br>CAG ACA GAA AAT GAG<br>CAC GGT ATC TAA TCA | CTG ACG GGG GAA ATC<br>CAC TGG CAG CGA GTC<br>GGA TGA GTC AGC GCT<br>GAG TCA CGC TCG GCG<br>CTA CGT GCC GGC CTG<br>GGC GGC CGC AGC CCG<br>GGG CCC GCA GCC GCG<br>GAG TCA GCA GAG ATC |
| chr6:106244048-<br>106244211 | enhancer | MCF7              | GAT CAA CTT GAT TCC<br>TTG TGT TTT ACG TGC<br>TCT ACG TGA GAA AGG<br>CTG AGA ACC CCA GAA<br>GGT GAC ACT GGC TAC<br>TCT GTA GGC ATG AAG<br>TGA CTC CGT GAG TCA<br>TTG CCA GAA TGT CAA | GCT GAG AAC CCC AGA<br>AGG TGA CAC TGG CTA<br>CTC TGT AGG CAT GAA<br>GTG ACT CCG TGA GTC<br>ATT GCC AGA ATG TCA<br>AAG GGA TTT CTT AGT<br>CAG GAA ACA GTC TCT<br>GCC TTG GTG TTG ATC |
| chr6:164406604-<br>164407478 | enhancer | MCF7              | GAT CAT CAA ATT GTA<br>ATT TAT CAA AAA TGT<br>ATT TTT ATC CAA GGG<br>CTC TGG TGT CGT TAA<br>GAA GTA TCT GCG TTT<br>GTT CCA TCC AGG GTT<br>AAC TGT CTT CTT GGA<br>GGA GGG AGA AAG TCA | AGG CCT GGC TGC CCC<br>CAA GTT GAT GGG GCC<br>AGC TCC CTG CTG TCT<br>TCC TGC CTG GCC CAC<br>TAC CTG GGG CCT AGG<br>CTT GCT CCT GCT CTT<br>GCT AGT CTT GTG TGG<br>ACC TTT CAG CTG ATC |

|                          |          |             |                                                                                                                                                                                      |                                                                                                                                                                                      |
|--------------------------|----------|-------------|--------------------------------------------------------------------------------------------------------------------------------------------------------------------------------------|--------------------------------------------------------------------------------------------------------------------------------------------------------------------------------------|
| chr7:101343709-101343829 | enhancer | MCF7        | GAT CTG GCT CTA ATG<br>GGG TGG GGG TGG GGG<br>GCC TGG GGA GAA GGG<br>ACT GGT GTG ACC TGG<br>GGC TGC AAA AAG GAT<br>TCA ATG TCA TCC GGT<br>GGG GCG GTG TGG AAT<br>CAA AGG GGT CAG AGG |                                                                                                                                                                                      |
| chr7:140677611-140678311 | enhancer | MCF7        | GAT CTA ATT ACA TTG<br>TTT TTC TTC AAG GGG<br>CTA GTT GGT TCT GCA<br>TCT CCA GTA TTG TGT<br>GTG CGT GCA TAT GTG<br>TGT GTA CCT GTC TCA<br>AAT AAA GTA ACA ATT<br>CCA GTT TGG CAA CCC | CTC CTG GGT TCA AGT<br>GAT TCT CGT GCG TGT<br>CAC CAC ACC CGG CTA<br>ATT TTT GTA TTT TTA<br>GTA GAG ACA GGG TTT<br>CAC CAT GTT GGC CAG<br>CTG GTC TCA AAC TCC<br>TGA ACT CAA GTG ATC |
| chr7:1451023-1452826     | enhancer | MCF7        | GAT CTG TGT AAA CTG<br>CAA TTG ATG CTG TGC<br>CGC TTG ATA TTA ATA<br>TCT TTT GTT TGT GTG<br>TCA GGG TTC TGC AGA<br>ATC TAA TTA AGA AGT<br>GTT CTC TGC GTA TCC<br>GGG GTG TTC GAA CAA | GTG CCC CGC CTC TTC<br>AGA CTC CGC CCG ATT<br>CCA GGC CAC GCC CCT<br>TGT AGG CGT GAC CGA<br>GGA CGC TGG TAC CCG<br>GAC CTG GAC TTC GCA<br>GGG TCT TGG AGG GGC<br>GGG CAG TGG GGG ATC |
| chr8:128882979-128883308 | enhancer | MCF7 & 7860 | GAT CTT GGG CAG ATG<br>GCT TAA CAT TTC TGG<br>GCC TCA GTG ACC TTA<br>CTT GCA AAG TTG TCT<br>GGG TCA AGG CAA TGA<br>TTA AAT GCG ATG ATG<br>CAT GTA AAG CCC CAG<br>CAT GCA GCC TGA AAA | GTC ACG TCT CCT TTC<br>TGC CTC CTC CTC CTC<br>CTC CTC TCT GTC CAG<br>TGA CTA GGG AGG GCA<br>GGA AGT TCA GAG GGT<br>GAA ATG CTG AAT TAA<br>TTC CTG TCC TCC TGG<br>TCT ATA TTC CAG ATC |
| chr8:134308800-134310950 | promoter | N/A         | GAT CCA CAC CCG TTC<br>CCG ACC CAG TCT GCA<br>AGC CAG ACA CAC CCA<br>CGC CCC CCT CTC CAG<br>CCT CCT TGC CAG CGC<br>CAC TCA CCT CTA CCA<br>ACC CCT CAT CTA CAC<br>ACT CGC GCG CAA TCT | ATT ATT AGG GCC AGT<br>TTT GGA GAA GGG TTT<br>TCT GGA ACA AAA GAA<br>ATA TGG AGA GGG GCA<br>AAC AGC ACC TCT AGG<br>ACC CAG GAC ATC TGT<br>GTT TCA GGC CTG TCT<br>TTG ACA CTA TCG ATC |
| chr8:68737619-68737739   | enhancer | 7860        | GTC CCT GAC TTA CCA<br>CAA CAT TAC TTG AGG<br>ACA GAA CTA CGC TCA<br>TTT CCT TAA CAC AAA<br>TAC ATC TCT TAC ACT<br>ACA ACT TCT CAA AGT<br>AGC AAA AAT GAA CCT<br>TCT CTT TAA CAG ATC |                                                                                                                                                                                      |
| chr8:82105545-82107367   | enhancer | MCF7 & 7860 | GAT CTC TTT TCC TCA<br>CAA AAC ATT ATT GAA<br>AGT GAC TTT CTT CAG<br>TTA CTT GGG ATT TTA<br>TCA TCA CGA CCA TGT<br>TAA CCA AAG AGG TAT<br>CAT CTG GAC ACT GAA<br>CCA GAA AGA AAA CCA | GTA TGG AAA TGC CTC<br>ATC ATG GCT CCA TTT<br>GGC TAT AAT AGC CTG<br>ATT TGG CAC AAG CTT<br>CTA ATA AAG CCT GAA<br>GGT TAA TCA TAC TGC<br>TGT GGA GCA GGA CTG<br>GAG TTT TGC TAG ATC |

|                          |          |             |                                                                                                                                                                                      |                                                                                                                                                                                      |
|--------------------------|----------|-------------|--------------------------------------------------------------------------------------------------------------------------------------------------------------------------------------|--------------------------------------------------------------------------------------------------------------------------------------------------------------------------------------|
| chr9:121093990-121094567 | enhancer | 7860        | GAT CAT GGG AGA AAC<br>TCT GAA CTT GGG ACT<br>AGT TGG GGG CAT AGA<br>GGG AGT GTC AAT GCT<br>TGG CTG GAA GTT GTC<br>CCT CAG AGC AAT CAT<br>TGC CCA GTG TTT TTG<br>GCT TTA GCT CAA CCT | TTT TAG CTA AAA CAT<br>TTT AAG CAC TAA TTA<br>TAG GCC AAA CAT AGT<br>GTT AAA CAT TTT GCA<br>CAC ATC ATC TCA TTT<br>AAT TTT CAC AAA ATT<br>TTT GAA ATT AGT ACT<br>ATT TTA ATT CAG ATC |
| chr10:71077459-71078709  | promoter | N/A         | GAT CTA CAA CTT CCT<br>GGC TGT ATA AAG TCC<br>AGC AAG ACT GAG GCC<br>TCA CTG AGC TTC AAT<br>TTC CTT ACC TGT CTA<br>ACC AGA ATA GCA ACA<br>ACT TGT TTG TAT ATT<br>TGA GCT CAT TAC ATG | GGG GGA GGA GGA GGA<br>GGA GGA GCC GCC GAG<br>CAG CCG CCG GAG GAC<br>CAC GGC TCG CCA GGG<br>CTG CGG AGG ACC GAC<br>CGT CCC CAC GCC TGC<br>CGC CCC GCG ACC CCG<br>ACC GCC AGC ATG ATC |
| chr10:74033444-74034056  | promoter | N/A         | GAT CCT TTC CAG AAA<br>GGG GGC GTG GCG GTG<br>GGT CGG GGT TCG ACT<br>GCG AGC TTT CTG GGG<br>CTC AAT GGA GGC GGG<br>GCC CGG CCG CTG TCA<br>CCG GGC AGG AGA GAA<br>CGT TGC TTA CGT GCG | TGA GTT CAT CAG CAA<br>ACG CCC TGG CGT CTG<br>TCC TCA CCA TGC CTA<br>GCC TTT GGG ACC GCT<br>TCT CGT CGT CGT CCA<br>CCT CCT CTT CGC CCT<br>CGT CCT TGC CCC GAA<br>CTC CCA CCC CAG ATC |
| chr10:99185459-99186091  | promoter | N/A         | GAT CAC ATT TTA CAG<br>ATG AGG CTG AGA GGT<br>TTC CCG ACC TGC CCA<br>AAG ACA CAA AGC AAG<br>TAG AAT GTA CGA GTG<br>AAG ACT CGA ACA CAG<br>GTC CGT GAA TCA ATC<br>TCT GCG TGG GGA TGG | GAG CGG TGC GAG CGC<br>GCA GGC GCG GCC GAC<br>GGG GCG GGC TGC TAC<br>TCC GGA ATC TGC TAA<br>TCC CAG TCG GTG CCG<br>CAT CCC CAG CCC GCC<br>GCC ATG GCC GCC TAC<br>AAA CTG GTG CTG ATC |
| chr11:18415792-18416140  | promoter | N/A         | GAT CCA AGC CTT CCT<br>GAG AGT AAC CTC CCC<br>AGG TTT CAT GGA TGA<br>GGA AAC TGA AGG TCG<br>TCC TGA CTC AGG CTC<br>ATG GCT CCG ACC CCG<br>GCT TCT GTG GTT GGA<br>GGG CAG CAC CTT ACT | CAC ACG TGG GTT CCC<br>GCA CGT CCG CCG GCC<br>CCC CCC GCT GAC GTC<br>AGC ATA GCT GTT CCA<br>CTT AAG GCC CCT CCC<br>GCG CCC AGC TCA GAG<br>TGC TGC AGC CGC TGC<br>CGC CGA TTC CGG ATC |
| chr11:69234614-69234815  | enhancer | 7860        | GAT CAC TGG GCA GCC<br>GTA CGT GTC CCA GGC<br>AGC GGG AGC CCC GGC<br>AGT GCC AGC TCC CAC<br>ACC ATC CGG CTG TGA<br>CAA CCT CAG GTC CTT<br>GAT GAC AGG GAG CCT<br>CTG CCA AGA CGG TCC | AGG TCC TTG ATG ACA<br>GGG AGC CTC TGC CAA<br>GAC GGT CCG AAA ATT<br>GGG AAG GGG ACC CGC<br>TCA TCT TTG TGG GGT<br>CCC CAA GAG CTT CAG<br>ATA AGT TTG CTG AGC<br>ACC GGC TTC CTG ATC |
| chr11:71010452-71010944  | enhancer | MCF7 & 7860 | GAT CCA GAG CTC AGA<br>GCC CAG CCC AAC ACT<br>GGG GGA CGT GAC ACA<br>GTG AGG AAG TAT GAA<br>GCT CCA GCA GGA ACG<br>CCA GCC AGA GGG AGC<br>ACC AGG AAT GAG TCA<br>TGT CAG CCT GGA CGT | TAC CTC CAG CGT CCT<br>CAT GAG AGA AGA GAA<br>GGG AAG GGC AGA GGA<br>CAC GGA GGG GAT GTG<br>ATG GAA ACA CAG AGC<br>AGA CAC TGG GGT GAT<br>GCA TCT ACA TTC CCA<br>GGA GCA TCG TGG ATC |

|                         |          |      |                                                                                                                                                                                      |                                                                                                                                                                                      |
|-------------------------|----------|------|--------------------------------------------------------------------------------------------------------------------------------------------------------------------------------------|--------------------------------------------------------------------------------------------------------------------------------------------------------------------------------------|
| chr12:33096894-33097372 | enhancer | MCF7 | GAT CGT TCT GGT TTT<br>AGC ACT GAA TGC TCA<br>TGT ACT AGG AAA ACC<br>TTC AGT TGC TGG CAA<br>ACC AAG ATG GTT GGT<br>TAC ACA GAT ATT TCT<br>TTT AAT TAT TTA AAT<br>CCT GTG TTG ATT AGA | GAT AAG CCA GAA AAG<br>GTG AGT CAG TAC AGA<br>ATG GCG TAA TAC AAG<br>AAA TGT CCC CAA GGG<br>CCA GAG TAG ACA GTG<br>AGG CCA TCA CGT AGA<br>CAT CAC TGT TAT TCA<br>AGT CTG CTG ATG ATC |
| chr12:46494485-46496603 | enhancer | 7860 | GAT CAG TTC CAT GAC<br>AAT GTC CTT TAA CTA<br>CAT CCT CAT TCA GCA<br>GGA AGT AGG CAG AAT<br>GAA CAC ATC GCC CAT<br>GTT CCA CAG AAA TGG<br>AAT GGA ATT TGG CAG<br>TGG GGA GTT GTA ATG | GAC TTT GCA AGT GGT<br>GAG CGA CTG AAC CTG<br>CAT GGA GTT GCA ATA<br>TTA GTG TTT TTT TTT<br>TTT TTT TTT TTG AGA<br>CAG AGT GTC GCT TTG<br>TCG CCT AGG CTG GAG<br>TGC AGT GAC GCG ATC |
| chr12:46887231-46888061 | enhancer | MCF7 | GAT CCC ACA TCT TTT<br>TTT TGC TGA GTG TTT<br>TCA TTT GAG GTT GAT<br>TGT AAC TAT TTA AGG<br>ACA TAT GGT AAC TAC<br>TTA AGG GCT TAA TTA<br>TTC AAT CAT GGA GAG<br>TTG GGT GGA ACA TGG | ATT GTT ACA TAT TCA<br>TAC ACA AGT ACT ATG<br>AAG CAT AAC AGG AAA<br>AAA CAG GTC TAC ATT<br>TTC ATA AAA TTA AAT<br>TCA CAC ATG CTC TGA<br>TAG GCA AAA AGT TTT<br>GTA CTT ACA TAG ATC |
| chr12:6643414-6644293   | promoter | N/A  | GAT CAC CTC CCA TCG<br>GGC CAA TCT CAG TCC<br>CTT CCC CCC TAC GTC<br>GGG GCC CAC ACG CTC<br>GGT GCG TGC CCA GTT<br>GAA CCA GGC GGC TGC<br>GGA AAA AAA AAA GCG<br>GGG AGA AAG TAG GGC | GGC GGA GCC CCG CAC<br>CCA GGC TGT GGC GCC<br>CTG TGC AGC TCC GCC<br>CTT GCG GCG CCA TCT<br>GCC CGG AGC CTC CTT<br>CCC CTA GTC CCC AGA<br>AAC AGG AGG TCC CTA<br>CTC CCG CCC GAG ATC |
| chr12:7023181-7024310   | promoter | N/A  | GAT CTG CTC TGT GCC<br>GGT CCT CTG GGC AGT<br>GTG GGG TGC AGA ATG<br>GGG TGC CTA GGC CTG<br>AGC GTT GCC TGG AGC<br>CTA GGC CGG GGG CCG<br>CCC TCG GGC AGG CGT<br>GGG TGA GAG CCA AGA | CCT CAC CTC CCC CAG<br>ACT TCC CTT GGA CTC<br>CCC TCT CTC CTG CTC<br>TTC CCC ACG GCG CCC<br>CTC TCC GTT CGC GCT<br>TCC TCC CCT CTG CTG<br>CAC GGG GGA GAG ATG<br>GAA GAA GTG GGG ATC |
| chr14:54404062-54405378 | enhancer | MCF7 | GAT CCA CCC GCC TCG<br>GCC TCC CAA AGT GCT<br>GGG ATT ACA GGC GTG<br>AGC CAC CGC GCC CAG<br>CCA GAA TGT TTC TTT<br>ACG TTT TAG GTC TGC<br>TGC TAG ATG TGT TTA<br>GCC TAA CGA AAA TGC | CCA GTA CAA ACT TTT<br>AGG CTA GGC TGG GTG<br>GTG CAT CGG ACG CTG<br>TGG ATG CTA TAA TTA<br>CAT AAC AGT TCT CCT<br>TTG ACC AGT GCT CAT<br>CCA CGT ACG TCA CGT<br>ACA CAC CAA TGG ATC |
| chr14:34420142-34420423 | promoter | N/A  | GAT CTG CCT TCG GGA<br>ACC AGC GGG AGT GGT<br>GCG GAG CTC CAC GAC<br>CCG TTT CCG GAC TGG<br>CCC GGC GAG CAG TGC<br>GGC GCA AGG AGT CGG<br>AGG GCG CCT TTT GGG<br>GAT GGG AAG CCA CCA | GCC CTT AAG CCG GCC<br>GAC TCC GCG CGT CAC<br>GGG CTC CGC CCC GGG<br>ACC GCC TCC GGG ACC<br>GCC CTT TCC CCC GCC<br>CCG CTG CCA GTC ACC<br>CCC GCC TGC TCT GCC<br>CCT CCG CGA AGG ATC |

|                         |          |             |                                                                                                                                                                                      |                                                                                                                                                                                      |
|-------------------------|----------|-------------|--------------------------------------------------------------------------------------------------------------------------------------------------------------------------------------|--------------------------------------------------------------------------------------------------------------------------------------------------------------------------------------|
| chr15:72523499-72525007 | promoter | N/A         | GAT CCG GAG CCA CGG<br>CGC GTG CAG CTG CTG<br>TGC AAG GAG CCA CTG<br>CCT CAG CCT CAA GGT<br>TAT CCC GCT GCG GGC<br>CGC CGC AAT CCC TCC<br>GCC GCC CCG CCC TCT<br>GCC CAA TCC CGG CTC | CTA GGG AGG GTT AGA<br>TTC CTC TCT ATC AGA<br>GAA AGA GGG ATG GCA<br>TAA AAG TCC CTC CCT<br>GGC CCC TGA GCT GAG<br>GAC AAA CTA AGA ACA<br>GTG GTG GAC AAC ACT<br>GGG ATG GCA AGG ATC |
| chr16:14458164-14459418 | enhancer | MCF7 & 7860 | GAT CTA TTA TGA TTT<br>CAA AAT TTA AAG TTT<br>TAA AAA ATG ACA TGC<br>ATG GTA TGA TGT CGG<br>CAA TTC GCT TTG AAA<br>TAC TCC AGC CAA GAG<br>AGG GAA GAG GCC GGA<br>GAG GGA GCC TGC AAA | AAG TAT GTT GAG GCC<br>AGG TGC AGT GAC GCA<br>TGC CTG TCA TCC CAA<br>CAT TTT GGG CAG CTG<br>AGG CGG GAG CAT GGC<br>TTG AGG CGA GGA GTT<br>TGA GAA AAG CCT GGG<br>CAA CAT CAT GAG ATC |
| chr16:30076906-30077297 | promoter | N/A         | GAT CGT GTT CTC GGC<br>GCC CGC CCC TTC CTA<br>GCG CGG CCT CTG GGC<br>TGC GCC TCT CGG GGG<br>CGG CCC GTA GCC CAG<br>TCC GTC GCC TGC CAT<br>TGG ACG CCG CCC GCT<br>CCT CGT AAA GGA AAA | CCT TGA ATC CAC TCG<br>CCA GCC CGC CGC CCT<br>CTG CCG CCG CAC CCT<br>GCA CAC CCG CCC CTC<br>TCC TGT GCC AGG TGA<br>GCG CCC CTC TTC ACG<br>TGC GGG GAC CAG GGA<br>CCG TGG AGA GGG ATC |
| chr17:26903868-26904491 | promoter | N/A         | GAT CCG CAA ACA GAT<br>GAG GCT GCA GCC CTG<br>GCT CCC TCT GGT AAA<br>TGA GGC TGC GGA TGT<br>CGC AGA GCT ACG TGA<br>CTC CTC CGG GGG CGT<br>GGC CTG CAT GCC CCG<br>CCC TGA CCA CAC CCC | TCC TCC AGG CGG TGA<br>GCC AGG GAA CAA GCA<br>GTC CAG TGC CCA GAG<br>TTT TGG TGA AAG CAG<br>AGG AAG GGA GGA AGG<br>GCA GGC AGC CTT GGC<br>TTT GGA TGC AGC AGG<br>AGG TGG AGA GGG ATC |
| chr19:34855951-34856857 | promoter | N/A         | GAT CAG CGG CCG CGG<br>GCA AGG TCG CTC AGC<br>GGG CAC CCG GCC TGG<br>GTA TCG GGG CGC GGG<br>TCG GGG GCG GGG CCG<br>GGG CTC AGG GGT GGG<br>GCC GGG CCG GGC CGG<br>GCC GGG CGC CTG CGC | GGG TGG AAG GAT GGA<br>GAC GTC GGG CGT GAT<br>TCC TGC AGA AGA CAC<br>CTG TGC ACG ACC GGG<br>AAG TGG GAA GGA GTG<br>TTT GAG CAA ATC ATG<br>GGC GGG AGT GCG GCC<br>AAG GGA GCT CTG ATC |
| chr20:40292823-40293501 | enhancer | MCF7        | GAT CTT GCC ATT GCA<br>CTC TAG CCT AGG CGA<br>CAG AGT GAG ACT CCA<br>TCT CAA AAC AAA CAA<br>AAA ATG AAA ACC ATG<br>AAT TAG AGC TAT ACC<br>AAT GAA CAT GGA TAA<br>TAT TTC ACA ATG TAT | CTC TTA AAG ATT TCT<br>GGA TGC GCA ACA AAA<br>TGC TCC CAT TGG TCA<br>GAA CTT AGT CAC ATG<br>AAC ACA TCT AGC TGC<br>AAA GGA GAA TGG GAA<br>ATG TAG TCT TTA TTC<br>TGT GTG GCT ATG ATC |
| chr21:45719837-45721899 | promoter | N/A         | GAT CCC TGC TCC GTC<br>CAG GGT CCG TCC TGC<br>GAG GAG GCG CCG GGG<br>GCG GGC CCG GGG CGG<br>GGC GGG CGG AAG GCG<br>CGC GCG GGG CGG GGC<br>GGG GAC GGC GAC GCG<br>GCG CAG GCG GCG GGA | ACT AAA CAG AGA AGG<br>GGG GCT CGC TGG AGG<br>TTG CTG AAG GGC CAG<br>CCT GGC AGG TGG TTC<br>TTG GGC CAG CGG GGA<br>GGG GCA CCC AGG GTG<br>ACA GGC GGT TCT GGA<br>TGC TGG TGG AGG ATC |

|                        |          |     |                                                                                                                                                                                      |                                                                                                                                                                                      |
|------------------------|----------|-----|--------------------------------------------------------------------------------------------------------------------------------------------------------------------------------------|--------------------------------------------------------------------------------------------------------------------------------------------------------------------------------------|
| chrX:77359452-77360120 | promoter | N/A | GAT CTT CGC CGC TAC<br>CCT TGT GGG CCC CCC<br>GGC GAC GCT TCC TGC<br>TCC GCC CCT AAG TCG<br>GGA AGG TTC CTT GCG<br>GTT CGC GGC GTG CCG<br>GAC GTG ACA AAC GGA<br>AGC CGC ACG TCT CAC | TTT TGG CTG GGC CCC<br>AGG GGT CCT AGG CTT<br>GGA GGG CGA GGC TGC<br>TCA CGG GTT TGG TGG<br>TTT CTA GCC GCA TTT<br>TCC CCA GCC CAG AAA<br>GCA CCC GAA GTC ACC<br>CTT CGG GGA TGG ATC |
|------------------------|----------|-----|--------------------------------------------------------------------------------------------------------------------------------------------------------------------------------------|--------------------------------------------------------------------------------------------------------------------------------------------------------------------------------------|

**Table S2: Number of unique informative reads per bait site**

| Bait Dpn2 fragment       | 7860 1 | 7860 2 | MCF7 N 1 | MCF7 N 2 | MCF7 H 1 | MCF7 H 2 | 7860+ VHL N | 7860+ VHL H |
|--------------------------|--------|--------|----------|----------|----------|----------|-------------|-------------|
| chr1:115666026-115666146 | 5243   | 3607   | 3689     | 1571     | 3732     | 854      | 16005       | 11645       |
| chr1:43424102-43424222   | 12964  | 3920   | 4019     | 2736     | 4212     | 1979     | 7552        | 6147        |
| chr1:8086133-8086253     | 11357  | 4356   | 5337     | 2719     | 4763     | 1562     | 10437       | 8839        |
| chr1:8938715-8938835     | 10815  | 4440   | 4762     | 3551     | 4169     | 2294     | 11164       | 8223        |
| chr10:71077459-71077579  | 8505   | 3743   | 4963     | 3155     | 4664     | 1730     | 9063        | 6455        |
| chr10:74033444-74033564  | 15189  | 4908   | 5149     | 3329     | 5276     | 2546     | 13723       | 12315       |
| chr10:99185459-99185579  | 12626  | 5841   | 6386     | 3552     | 5831     | 2344     | 17974       | 13654       |
| chr11:18415792-18415912  | 6492   | 3020   | 3953     | 2679     | 3646     | 1902     | 9218        | 7731        |
| chr11:69234614-69234734  | 11220  | 5318   | 6635     | 3280     | 5788     | 1793     | 12119       | 10466       |
| chr11:71010452-71010572  | 14073  | 7515   | 9161     | 5627     | 9107     | 3738     | 18737       | 14353       |
| chr12:33096894-33097014  | 3000   | 2175   | 2843     | 1136     | 2914     | 647      | 10754       | 7958        |
| chr12:46494485-46494605  | 3164   | 2862   | 3829     | 1446     | 3695     | 921      | 6560        | 5988        |
| chr12:46887231-46887351  | 1163   | 1054   | 951      | 454      | 822      | 278      | 17134       | 13450       |
| chr12:6643414-6643534    | 13545  | 5525   | 7835     | 4259     | 7108     | 2676     | 10645       | 8094        |
| chr12:7023181-7023301    | 12402  | 4612   | 7556     | 3598     | 7990     | 2242     | 7738        | 5483        |
| chr14:54404062-54404182  | 1641   | 1313   | 2618     | 1215     | 2701     | 668      | 7471        | 5171        |
| chr15:72523499-72523619  | 8716   | 4282   | 6239     | 3641     | 6200     | 2560     | 8673        | 6166        |
| chr16:14458164-14458284  | 6461   | 3500   | 2687     | 1247     | 2437     | 652      | 18226       | 15942       |
| chr16:30076906-30077026  | 17734  | 6796   | 8412     | 6912     | 7403     | 4557     | 10951       | 9137        |
| chr17:26903868-26903988  | 12900  | 5259   | 9389     | 5845     | 9076     | 4009     | 5979        | 4108        |

|                          |       |      |       |      |       |      |       |       |
|--------------------------|-------|------|-------|------|-------|------|-------|-------|
| chr19:34855951-34856071  | 11413 | 3583 | 6604  | 4206 | 6842  | 2865 | 9165  | 7314  |
| chr2:173420581-173420701 | 8303  | 2659 | 3258  | 2678 | 2671  | 1607 | 6512  | 6458  |
| chr2:70823890-70824010   | 7962  | 5614 | 5584  | 3118 | 5192  | 2048 | 15114 | 12420 |
| chr2:75060942-75061062   | 13308 | 4471 | 5955  | 4578 | 5013  | 2950 | 7688  | 6142  |
| chr20:40292823-40292943  | 2944  | 2653 | 2890  | 1288 | 2849  | 851  | 14388 | 10224 |
| chr21:45719837-45719957  | 22265 | 5495 | 8381  | 5560 | 8190  | 3958 | 7937  | 6348  |
| chr3:150063120-150063240 | 2233  | 2286 | 2745  | 1245 | 2514  | 732  | 19912 | 15680 |
| chr5:14570251-14570371   | 4955  | 6846 | 11660 | 4136 | 11622 | 2448 | 17207 | 11954 |
| chr5:34586108-34586228   | 7048  | 4418 | 3796  | 1741 | 3507  | 1034 | 18809 | 13791 |
| chr5:3926200-3926320     | 4219  | 1876 | 3155  | 1052 | 3514  | 662  | 5325  | 3300  |
| chr5:90575785-90575905   | 5380  | 2849 | 4683  | 2930 | 4869  | 2112 | 7683  | 6123  |
| chr6:106244048-106244168 | 4153  | 2681 | 3602  | 1453 | 3573  | 778  | 9461  | 6243  |
| chr6:164406604-164406724 | 2835  | 1489 | 1185  | 425  | 1347  | 267  | 11145 | 8316  |
| chr14:34420142-34420262  | 6016  | 2064 | 3566  | 2387 | 3682  | 1428 | 7347  | 5854  |
| chr7:101343709-101343829 | 2858  | 1452 | 1833  | 769  | 1720  | 444  | 926   | 547   |
| chr7:140677611-140677731 | 2511  | 4153 | 5194  | 1749 | 5510  | 962  | 15462 | 11427 |
| chr7:1451023-1451143     | 4727  | 1971 | 5125  | 2343 | 4722  | 1384 | 3379  | 2220  |
| chr8:128882979-128883099 | 9505  | 6450 | 4212  | 1631 | 4150  | 941  | 23985 | 19157 |
| chr8:134308800-134308920 | 15716 | 7815 | 6016  | 3129 | 5588  | 1819 | 18875 | 14552 |
| chr8:68737619-68737739   | 1044  | 1400 | 432   | 147  | 494   | 95   | 7348  | 6374  |
| chr8:82105545-82105665   | 3782  | 3727 | 1966  | 735  | 2279  | 480  | 22905 | 19110 |
| chr9:121093990-121094110 | 5386  | 3595 | 2164  | 899  | 2273  | 567  | 14014 | 12098 |
| chrX:77359452-77359572   | 5561  | 2413 | 2114  | 1493 | 2273  | 1013 | 8057  | 5936  |

## References

1. Jin F, Li Y, Dixon JR, Selvaraj S, Ye Z, Lee AY *et al* A high-resolution map of the three-dimensional chromatin interactome in human cells. *Nature* 2013; **503**: 290-294.
